# Supplementary material for: Case report: First report of potentially zoonotic Gongylonema pulchrum in a free-living roe deer (Capreolus capreolus) in Slovenia
Source: Front Vet Sci. 2024 Jul 26;11:1444614. doi: 10.3389/fvets.2024.1444614 (PMC11310155; doi:10.3389/fvets.2024.1444614)
Supplement: Supplementary file 1 [file Table_1.XLSX]

## Sheet: Primers
Amplicon/segmenta	Primer name		Primer name according to Makouloutou et al. (2012)b and Halajian et al. (2010)c	Primer sequence	Amplicon size [bp]	Positione
G1	G1-F		F-47	5'-CCCGATTGATTCTGTCGGC-3'	1211	1 (18S)
	G1-R		18S-1192R/20	5'-CAGGTGAGTTTTCCCGTGTT-3'		1211 (18S)
G9	G9-F	(= G1-F)	F-47	5'-CCCGATTGATTCTGTCGGC-3'	588	1 (18S)
	G9-R		SSU9R	5'-AGCTGGAATTACCGCGGCTG-3'		588 (18S)
G2	G2-F		SSU22F	5'-TCCAAGGAAGGCAGCAGGC-3'	1230	414 (18S)
	G2-R		NSR1787/18	5'-CGACGGGCGGTGTGTACA-3'		1643 (18S)
G10	G10-F		SSU24F	5'-AGAGGTGAAATTCGTGGACC-3'	313	899 (18S)
	G10-R	(= G1-R)	18S-1192R/20	5'-CAGGTGAGTTTTCCCGTGTT-3'		1211 (18S)
G3	G3-F		SSU23F	5'-ATTCCGATAACGAGCGAGACT-3'	918-929d	1312 (18S)	Contains ITS1
	G3-R		NC13(ITS1)/R	5'-GCTGCGTTCTTCATCGAT-3'		43 (5.8S)
G4	G4-F		NC5(ITS1)/F	5'-GTAGGTGAACCTGCGGAAGGATCATT-3'	1202-1213d	1778 (18S)	Contains ITS1 and ITS2
	G4-R		28S-408R/20	5'-TTCACGCCCTCTTGAACTCT-3'		413 (28S)
G5	G5-F		28S/F	5'-AGCGGAGGAAAAGAAACTAA-3'	1191	50 (28S)
	G5-R		28S-1270R/22	5'-CAGCTATCCTGAGGGAAACTTC-3'		1240 (28S)
G6	G6-F		28S-839F/20	5'-TATCCGACCCGTCTTGAAAC-3'	955	855 (28S)
	G6-R		28S-1670R/20	5'-TACCACCAAGATCTGCACCA-3'		1809 (28S)
G7	G7-F		28S-1449F/27	5'-GGAAGTCGGAATCCGCTAAGGAGTGTG-3'	1538	1522 (28S)
	G7-R		NLR2781/19	5'-CCGCCCCAGYCAAACTCCC-3'		3059 (28S)
G14	G14-F	(= G7-F)	28S-1449F/27	5'-GGAAGTCGGAATCCGCTAAGGAGTGTG-3'	1112	1522 (28S)
	G14-R		NLR2362/20	5'-ACATTCAGAGCACTGGGCAG-3'		2633 (28S)
G12	G12-F		NLF1999/19	5'-CCGCAKCAGGTCTCCAAG-3'	915	1719 (28S)
	G12-R	(= G14-R)	NLR2362/20	5'-ACATTCAGAGCACTGGGCAG-3'		2633 (28S)
G8	G8-F		NLF2551/21	5'-GGGAAAGAAGACCCTGTTGAG-3'	750	2816 (28S)
	G8-R		NLR3284/21	5'-TTCTGACTTAGAGGCGTTCAG-3'		3565 (28S)
a Amplicons/segments G1-G8 (in bold) cover the complete region 18S rRNA - ITS1 - 5.8S rRNA - ITS2 - 28S rRNA, but additional amplicons/segments (G9, G10, G12 and G14) were sequenced to enable reconstruction of a complete nucleotide sequence of the region.
b Makouloutou et al. (2012) Genetic variation of Gongylonema pulchrum from wild animals and cattle in Japan based on ribosomal RNA and mitochondrial cytochrome c oxidase subunit I genes. https://doi.org/10.1017/s0022149x12000442
c Halajian et al. (2010) Incidence and genetic characterization of Gongylonema pulchrum in cattle slaughtered in Mazandaran Province, northern Iran. https://pubmed.ncbi.nlm.nih.gov/22347239/
d See Table 1 in Halajian et al. (2010)
e See Table 1 in Makouloutou et al. (2012)
